# Supplementary material
Source: publisher figshare collection journal article supplement (https://springernature.figshare.com/ndownloader/files/39361865)
Supplement: Supplementary file [file 39361865]

## **Plain Language Glossary Example**

**Advocacy** – Sharing your story, thoughts, and opinions to support a cause that promotes a change.

**Accommodations** – A change in the environment that makes it easier for yourself or others to participate.

**Analyze** – To organize and understand the detailed information, sometimes called data.

**Analysis** – What we get from analyzing information.

**Assent (for research)** – A person choosing that they want to participate in a research study and know what the study is about and all the risks of participating. A person who has someone else who legally makes their decisions gives assent. Legally authorized representatives, or guardians, gives consent for the person participating.

**Barriers** – Things that make it harder to do something.

**Consumer** – A person who uses something for personal use.

**Consent (for research)** – A person choosing that they want to participate in a research study and know what the study is about and all the risks of participating.

**Co-researcher** – A person who is on the research team who would normally be a participant and not a researcher.

**Critical Thinking** – Taking time to reflect on or think about something you read or hear.

**Curriculum** – A program, course, or workshop that teaches us about a specific topic.

**Data** – Facts or information collected for research analysis.

**Disability Awareness** – Knowing about and teaching others about what it is like to have a disability.

**Empower** – To give someone new knowledge or skills so that they can do something new that they couldn't do before.

**Findings/Results** – The outcome of the research process or the information you find out after doing research.

**Health** – Your physical, mental, and social well-being.

**Health Disparity** – A difference in health between two groups that is caused by things that could be prevented (for example: access to health care or discrimination).

**Health Research** – Research studies that focus on health of certain groups or health of the whole population.

**Inclusion** – All people being able to participate in all different kinds of activities they choose.

**Incentives** – Rewards or money that someone gets after doing an activity that helps motivate them (example: money or gift cards).

**Participant** – A person who takes part in an activity.

**Perspectives** – A person's unique opinion or what and how they think about an issue.

**Policy** – Rules or guidelines that governments and organizations follow.

**Population** – A group of people with something in common.

**Process** – A series of actions to achieve a goal.

**References** – Giving another person credit when you use their ideas, especially in a research paper.

**Research** – The process of asking a question that is important to us, finding the answers, and sharing the information with other people.

**Researcher** – A person who does scientific research.

**Research Team** - A group of individuals who work together to answer a specific research question.

**Results/Findings** – The outcome of the research process or the information you find out after doing research.

**Self-Advocate** – A person who speaks for themselves and advocates for their needs. They are an expert in the conditions or diagnoses they have.

**Survey** – A series of questions asked to better understand a group of people or a specific question.

**Voluntary** – Doing an activity because you want to, not because you have to

**Well-being** – A state of being physically, mentally, and socially healthy.
